# Supplementary material for: Computational assessment on the Tolman cone angles for P-ligands
Source: Royal Society of Chemistry journal article supplement (doi:10.1039/c9dt02876e), 2019-01-01
Supplement: c9dt02876e1.xlsx [file c9dt02876e1.xlsx]

## Sheet: Final Cone Angles
#	Ligand	Cone angle AuCl_P	Cone angle Ni4_P	Cone angle Ir6_P	Tolman	Solid	He8	S4'	Vbur-L	Vbur-T	Vbur-O
1	PH3	105.071	106.378	100.992	87		2.3	66.9	18.2	18.3	17.8
2	PMe3	121.734	120.546	122.131	118	124	3	39.35	23.3	23.3	22.6
3	PEt3	167.702	168.957	157.794	132	143	6	38.95	28.6	28.9	24.8
4	PPr3	167.676	169.106	157.688	132		6.1	39.15	27	27	24.7
5	PiPr3	174.132	170.146	163.117	160	163	12.18	28.4	31.6	30.5	27.4
6	PnBu3	168.563	171.481	160.595	132	148	6.1	40.225	25.5	25.4	24
7	PtBu3	187.699	183.673	167.071	182	182	23.38	7.4	37	35.6	30.7
8	PnPent3	198.312	170.161	155.021	180		31.31	48.6	39	35.9	30
9	PCyp3	178.566	165.216	161.475			9.22	33.3	33.1	31.4	29.3
10	PCy3	176.287	174.744	164.901	170		16.65	28.55	32.9	31.9	28.2
11	PPh3	167.972	165.787	151.971	145	129	8	32.6	29.8	29.5	27
12	PoTol3	190.296	183.423	175.64	194	142	30.11	30.975	35	33.7	30.1
13	PoClPh3	189.891	184.742	173.657			23.63	28.425	40.5	38.5	30.9
14	PpTol3	167.877	165.696	152.052	145	135	6.6	33.625	29.8	29.4	27
15	PpClPh3	168.262	165.976	151.98	145	129	8.2	33.675	29.9	29.6	27
16	P35Me2Ph3	177.067	170.761	164.871					29.8	29.4	27.1
17	P35Cl2Ph3	170.205	169.236	160.647					29.8	29.8	27
18	Pnaph3	189.892	184.153	173.126			23.53	21.9	35.5	34	30.4
19	PBn3	187.546	165.897	153.263	165	163	12.65	38.11	33.9	29.1	25.8
20	PF3	108.497	114.907	104.712	104		1.5	62	20.9	21.6	20.4
21	PCl3	118.548	118.979	116.413	125		2.2	48.25	23.8	24.5	22.7
22	PBr3	123.429	123.565	120.701	131		3.1	45.1239	24.7	25.2	23.3
23	PI3	129.555	129.107	125.714			4.12	37.8527	26	26.4	24.1
24	PCF33	135.016	141.639	139.062	137		3	52.15	28.6	29.1	26.3
25	PCCl33	172.592	171.656	159.309			20.66	28.65	38.3	38.3	31.8
26	PC2F53	173.891	173.492	165.26			9.92	39.9	37	37.1	31
27	PC6F53	177.886	172.547	159.289	184		11.6	35.675	36.3	35.5	30.8
28	POMe3	168.769	156.764	152.965	107		4.24	40.15	26.3	29	25.9
29	POEt3	171.057	170.704	152.572	109		3	45.85	31.6	30.2	26.4
30	POPr3	187.649	178.515	155.055					33.7	30.7	25.5
31	POiPr3	182.992	172.467	146.025	130		4.36	47.85	32.5	31.5	25.4
32	POBu3	196.643	179.375	153.372	110		7.05	49.35	33.1	29	26
33	POtBu3	200.903	175.977	157.742	172		9.38	46.425	33.6	33.4	27.5
34	POnPent3	187.562	166.076	147.705			4.34	49.725	33.8	27.3	24.5
35	POPh3	168.814	152.936	130.491	128		5.94	48.875	32.6	27.7	22.2
36	BrettPhos	251.259	191.415	181.551					55	35	30.5
37	tBuBrettPhos	250.925	196.876	182.288					58.5	36.5	31.7
38	CataCxium-PCy	216.564	175.764	179.676			19.85	28.425	43.4	31.9	30.4
39	CataCxium-POMeCy	221.157	176.397	163.156			22.3		48.3	32.5	28.6
40	CataCxium-POMetB	224.005	183.285	168.083					51.4	34.6	30.6
41	CataCxium-PtB	225.225	183.382	168.035			37.42		48.7	34.7	30.6
42	CPhos	214.741	177.551	164.224			31.7	36.45	51.3	32.9	28.2
43	DavePhos	211.207	173.243	164.412			26.05	37.875	49.6	31.4	28.3
44	tBuDavePhos	228.114	188.529	172.736			43.72	14.175	51.4	36.1	31.2
45	PhDavePhos	206.899	161.341	155.565					47.9	30.5	27.5
46	JackiePhos	236.163	194.156	193.605					54.1	34.3	30.9
47	JohnPhos	228.861	184.117	166.652			45.88	18.975	50.4	34.9	30.7
48	CyJohnPhos	207.954	176.42	164.831					47.7	31.6	28.5
49	MePhos	208.885	174.393	165.295			23.48	32.175	43.6	31.4	28.3
50	tBuMePhos	228.906	183.795	160.815			42.99	19.725	51	34.9	30.1
51	MeDalPhos	214.658	185.746	170.365					44.9	35.1	30.4
52	MorDalPhos	231.189	186.475	173.364					47.6	35.3	30.8
53	RuPhos	231.496	205.479	212.656			17.96	36.3	54	35.1	32.7
54	SPhos	227.444	204.361	201.696			24.06	25.95	48.8	35.4	32
55	XPhos	238.744	173.283	172.211			22.15	28.575	52.4	31.9	29.9
56	tBuXPhos	250.58	178.56	178.892			34.58	10.575	53.8	33.8	30.4
57	cBridP	225.954	210.027	198.328			44.88	14.7	50.6	44.1	34.4
58	CycBridP	224.285	204.249	194.129					46.8	39.5	30.7
59	vBridP	227.414	210.885	201.277					50.2	43.6	34.1
60	CyvBridP	211.101	192.795	174.592					43.1	35.9	31
61	PH2Me	112.017	112.962	110.004					19.4	19.5	18.9
62	PH2Et	135.303	136.013	126.02					20.6	20.6	19.7
63	PH2iPr	136.186	134.196	128.691					21.7	21.6	20.9
64	PH2tBu	136.558	134.462	128.93					21.9	21.8	21.1
65	PH2nPent	114.279	115.702	113.988					19.5	19.5	19
66	PPhH2	140.307	140.195	120.706	101				21.1	21.1	19.7
67	PHMe2	120.195	118.982	120.764			2.64	45.225	21.1	21.2	20.7
68	PHEt2	145.792	144.711	141.732					23.3	23.2	21.8
69	PHiPr2	143.581	142.19	130.648					24.6	24.3	23
70	PHtBu2	174.399	169.874	162.837					29.8	28.9	26
71	PHnPent2	157.855	166.295	152.772					26	26.6	23.8
72	PAd2H	175.649	171.33	164.17			11.29	31.425	29.9	28.9	26.1
73	PPh2H	148.139	147.225	139.184	128	112			24.9	24.7	23.3
74	PMe2Et	143.857	142.638	138.507	123	133	3.61	38.4	25.1	25.1	23.6
75	PMe2Pr	144.065	142.76	138.271			3.87	38.775	25.1	25.1	23.7
76	PMe2iPr	147.615	146.718	140.591	132		3.86	31.425	25.6	25.6	23.9
77	PMe2tBu	147.027	145.916	143.225	139	144	4.68	31.55	27.7	27.9	25.9
78	PMe2nPent	131.067	130.291	129.681					24	24	23
79	PAd2Me	176.142	171.427	165.669					33	31.9	28.6
80	PPhMe2	149.568	147.76	133.206	122	126	3.23	36.1225	26	25.9	24
81	PMe2Bn	163.19	122.854	123.912			4.59	39.3	27.8	23.5	22.7
82	PMeEt2	142.806	141.533	137.486	127	138	4.31	39.375	25.1	25.1	23.7
83	PMePr2	142.768	141.405	137.104					25.1	25.1	23.7
84	PMeiPr2	170.054	166.382	160.075	146	151	5.36	20.925	29	28.5	26.2
85	PMetBu2	174.453	169.942	165.166	161	163	15	20.25	32.8	31.8	28.6
86	PMenPent2	165.529	161.349	151.034					31.4	30.3	26.3
87	PPh2Me	152.441	147.385	142.333	136	124	4.83	34.635	27.8	27.1	25.5
88	PBn2Me	183.891	178.507	145.227					28.5	31.6	25.3
89	PMeEtPr	142.885	141.517	137.343					25.1	25.1	23.7
90	PEt2Pr	155.164	145.398	139.962					27.1	25.5	23.9
91	PPhEt2	157.56	155.727	139.411	136	137	7.29	36.4425	28	26.5	24.9
92	PEt2Bn	184.861	156.163	145.828					32.1	27.5	25.1
93	PEtPr2	155.248	154.594	142.239					27	27	24.6
94	PPh2Et	168.272	152.847	148.23	140	140	5.41	34.295	29.8	28.4	26.4
95	PBn2Et	171.693	168.827	154.446					30.4	29.9	25.4
96	PCyiPr2	176.336	173.155	164.506					33	31.9	28.5
97	PCy2iPr	176.014	174.668	164.179					32.9	32	28.2
98	PAd2iPr	181.806	177.143	169.165					35.5	33.8	29.7
99	PPhiPr2	172.702	169.143	162.441			10.5	28.35	31.8	30.7	27.9
100	PPh2iPr	174.341	170.771	156.611	150	139	9.38	33.825	31.9	31	27.6
101	PiPr2Bn	181.941	177.894	172.702					33.8	32.6	29
102	PBn2iPr	186.936	181.408	171.036					31.9	30.8	27.1
103	PAd2Bu (CataCxium-A)	180.648	176.312	169.247	176		19.31	17.55	34.3	32.8	29.5
104	PCytBu2	181.97	177.431	168.564			22.86	5.325	35.3	33.8	29.9
105	PPhtBu2	186.894	182.73	167.686	170	168	22.9	13.05	36.1	34.5	29.9
106	PtBu2Bn	196.727	188.916	177.363			22.57	21.15	38.1	35.3	30.6
107	PCy2tBu	181.793	178.358	169.423			18.49	21.9	34.4	33.1	28.7
108	PAd2tBu	188.905	184.575	172.951			32.18	5.925	37.3	35.7	30.4
109	PPh2tBu	168.537	163.913	155.589	157	149	9.22	20.775	32.3	31.1	28.2
110	PBn2tBu	194.616	169.708	166.308			15.37	19.125	36.9	32.8	29.2
111	PPhnPent2	185.653	179.941	171.656					33.4	31.6	27.4
112	PnPent2Bn	194.34	179.616	173.032					37.9	35.2	30.3
113	PPh2nPent	180.937	148.545	146.388					34.3	27.7	26.1
114	PBn2nPent	200.688	182.835	159.84					38.4	34.1	26.4
115	PCy2Ph	172.582	169.027	162.236	159		12.49	21.095	31.7	30.6	27.9
116	PCyPh2	174.292	170.397	158.243	152		10.85	33.2275	31.9	30.9	27.7
117	PAd2Bn (CataCxium-Abn)	198.276	189.335	165.234			26.39	21.6	38.5	35	29.3
118	PPh2Bn	188.637	169.579	165.479	152	139	6.78	36.6	32.6	30.7	27.9
119	PBn2Ph	189.864	181.885	171.319			9.34	28.875	32	26.9	26.4

## Sheet: Biaryls
#	Ligand	qL close	Energy close	qL open	Energy open	Energy difference
36	BrettPhos	251.259	-2453.61	202.351	-2453.6	7.84244
37	tBuBrettPhos	250.925	-2298.72	218.565	-2298.71	9.55042
38	CtPCy	216.564	-1848.62	178.936	-1848.61	6.24134
39	CtPOMeCy	221.157	-1963.15	178.743	-1963.15	4.72972
40	CtPOMetB	224.005	-1808.29	188.704	-1808.28	10.3395
41	CtPtB	225.225	-1693.76	188.708	-1693.75	8.29192
42	CPhos	214.741	-2138.63	174.213	-2138.61	12.3143
43	DavePhos	211.207	-2004.66	177.295	-2004.65	5.86187
44	tBuDavePhos	228.114	-1849.8	195.012	-1849.78	9.69913
45	PhDavePhos	206.899	-1997.37	163.793	-1997.35	7.72265
46	JackiePhos	236.163	-3794.66	209.494	-3794.66	3.77995
47	JohnPhos	228.861	-1715.83	190.856	-1715.82	7.01318
48	CyJohnPhos	207.954	-1870.69	180.16	-1870.68	3.91131
49	MePhos	208.885	-1910.01	199.534	-1910.01	2.47195
50	tBuMePhos	228.906	-1755.15	191.708	-1755.13	10.5676
51	MeDalPhos	214.658	-2083.32	191.495	-2083.32	5.04019
52	MorDalPhos	231.189	-2235.97	192.611	-2235.96	6.06446
53	RuPhos	231.496	-2257.04	219.878	-2257.03	5.42286
54	SPhos	227.444	-2099.75	218.254	-2099.75	0.991873
55	XPhos	238.744	-2224.55	174.735	-2224.54	9.36827
56	tBuXPhos	250.58	-2069.69	185.664	-2069.66	15.6509
57	cBridP	225.954	-1871.85	186.571	-1871.83	10.0364
58	CycBridP	224.285	-2026.72	184.987	-2026.71	6.04897
59	vBridP	227.414	-1832.54	188.529	-1832.53	6.6425
60	CyvBridP	211.101	-1987.4	181.819	-1987.39	4.1331

## Sheet: Titanocene Enthalpies
	Ligand	DH	Ir6_P		Correlation data				#	Ligand	Cone angle Ir6_P	predicted DH
	PF3	17.4	104.712		-0.144983	32.3886			1	PH3	100.992	17.7465
	PMe3	14.5	122.131		0.00683612	0.939794			2	PMe3	122.131	14.6817
	PMe2Ph	12.9	133.206		0.991185	0.30543			3	PEt3	157.794	9.5112
	POMe3	10.4	152.965		449.794	4			4	PPr3	157.688	9.52657
	POEt3	10.6	152.572		41.9602	0.373151			5	PiPr3	163.117	8.73946
	PPh3	10	151.971						6	PnBu3	160.595	9.10511
									7	PtBu3	167.071	8.1662
									8	PnPent3	155.021	9.91324
									9	PCyp3	161.475	8.97752
									10	PCy3	164.901	8.48081
									11	PPh3	151.971	10.3554
									12	PoTol3	175.64	6.92384
									13	PoClPh3	173.657	7.21134
									14	PpTol3	152.052	10.3437
									15	PpClPh3	151.98	10.3541
									16	P35Me2Ph3	164.871	8.48516
									17	P35Cl2Ph3	160.647	9.09757
									18	Pnaph3	173.126	7.28833
									19	PBn3	153.263	10.1681
									20	PF3	104.712	17.2072
									21	PCl3	116.413	15.5107
									22	PBr3	120.701	14.889
									23	PI3	125.714	14.1622
									24	PCF33	139.062	12.227
									25	PCCl33	159.309	9.29156
									26	PC2F53	165.26	8.42876
									27	PC6F53	159.289	9.29446
									28	POMe3	152.965	10.2113
									29	POEt3	152.572	10.2683
									30	POPr3	155.055	9.90831
									31	POiPr3	146.025	11.2175
									32	POBu3	153.372	10.1523
									33	POtBu3	157.742	9.51874
									34	POnPent3	147.705	10.9739
									35	POPh3	130.491	13.4697
									36	BrettPhos	181.551	6.06685
									37	tBuBrettPhos	182.288	5.96
									38	CataCxium-PCy	179.676	6.33869
									39	CataCxium-POMeCy	163.156	8.73381
									40	CataCxium-POMetB	168.083	8.01948
									41	CataCxium-PtB	168.035	8.02644
									42	CPhos	164.224	8.57897
									43	DavePhos	164.412	8.55171
									44	tBuDavePhos	172.736	7.34487
									45	PhDavePhos	155.565	9.83437
									46	JackiePhos	193.605	4.31923
									47	JohnPhos	166.652	8.22695
									48	CyJohnPhos	164.831	8.49096
									49	MePhos	165.295	8.42369
									50	tBuMePhos	160.815	9.07321
									51	MeDalPhos	170.365	7.68863
									52	MorDalPhos	173.364	7.25382
									53	RuPhos	212.656	1.55717
									54	SPhos	201.696	3.14618
									55	XPhos	172.211	7.42099
									56	tBuXPhos	178.892	6.45236
									57	cBridP	198.328	3.63448
									58	CycBridP	194.129	4.24326
									59	vBridP	201.277	3.20692
									60	CyvBridP	174.592	7.07579
									61	PH2Me	110.004	16.4399
									62	PH2Et	126.02	14.1179
									63	PH2iPr	128.691	13.7306
									64	PH2tBu	128.93	13.696
									65	PH2nPent	113.988	15.8623
									66	PPhH2	120.706	14.8883
									67	PHMe2	120.764	14.8799
									68	PHEt2	141.732	11.8399
									69	PHiPr2	130.648	13.4469
									70	PHtBu2	162.837	8.78006
									71	PHnPent2	152.772	10.2393
									72	PAd2H	164.17	8.5868
									73	PPh2H	139.184	12.2093
									74	PMe2Et	138.507	12.3075
									75	PMe2Pr	138.271	12.3417
									76	PMe2iPr	140.591	12.0053
									77	PMe2tBu	143.225	11.6235
									78	PMe2nPent	129.681	13.5871
									79	PAd2Me	165.669	8.36947
									80	PPhMe2	133.206	13.076
									81	PMe2Bn	123.912	14.4235
									82	PMeEt2	137.486	12.4555
									83	PMePr2	137.104	12.5109
									84	PMeiPr2	160.075	9.1805
									85	PMetBu2	165.166	8.44239
									86	PMenPent2	151.034	10.4913
									87	PPh2Me	142.333	11.7528
									88	PBn2Me	145.227	11.3332
									89	PMeEtPr	137.343	12.4762
									90	PEt2Pr	139.962	12.0965
									91	PPhEt2	139.411	12.1764
									92	PEt2Bn	145.828	11.2461
									93	PEtPr2	142.239	11.7664
									94	PPh2Et	148.23	10.8978
									95	PBn2Et	154.446	9.99661
									96	PCyiPr2	164.506	8.53808
									97	PCy2iPr	164.179	8.58549
									98	PAd2iPr	169.165	7.86261
									99	PPhiPr2	162.441	8.83747
									100	PPh2iPr	156.611	9.68272
									101	PiPr2Bn	172.702	7.3498
									102	PBn2iPr	171.036	7.59134
									103	PAd2Bu (CataCxium-A)	169.247	7.85072
									104	PCytBu2	168.564	7.94974
									105	PPhtBu2	167.686	8.07704
									106	PtBu2Bn	177.363	6.67404
									107	PCy2tBu	169.423	7.8252
									108	PAd2tBu	172.951	7.3137
									109	PPh2tBu	155.589	9.83089
									110	PBn2tBu	166.308	8.27682
									111	PPhnPent2	171.656	7.50145
									112	PnPent2Bn	173.032	7.30196
									113	PPh2nPent	146.388	11.1649
									114	PBn2nPent	159.84	9.21457
									115	PCy2Ph	162.236	8.86719
									116	PCyPh2	158.243	9.44611
									117	PAd2Bn (CataCxium-Abn)	165.234	8.43253
									118	PPh2Bn	165.479	8.39701
									119	PBn2Ph	171.319	7.55031

## Sheet: Suzuki barriers
	Raw data											Raw data			Standardized data			Computed barriers
		OA	TM	RE	HOMO	LUMO	He8	Ni_4P		#	Ligand	Cone angle Ni4_P	E(HOMO)	E(LUMO)	Cone angle Ni4_P	E(HOMO)	E(LUMO)	OA Barrier	TM Barrier	RE Barrier
	PtBu3	3.2	19.8	3.2	-0.17267	0.02754	23.8	183.673		1	PH3	106.378	-0.24636	-0.00029	-1.94623	-0.956805	0.280476	8.15078	68.2176	-11.0189
	P(CF3)3	11	14.4	1.7	-0.27742	-0.05837	3	141.639		2	PMe3	120.546	-0.19045	0.03268	-1.35366	0.397841	1.05756	3.92464	138.147	30.6625
	PMe3	3.9	18.3	4.7	-0.19045	0.03268	3	120.546		3	PEt3	168.957	-0.18723	0.02584	0.671106	0.475859	0.896346	4.24703	123.781	32.9992
	PPh3	4.3	16.4	3.9	-0.18694	-0.05061	8	165.787		4	PPr3	169.106	-0.18767	0.0253	0.677337	0.465198	0.883618	4.28338	122.637	32.6708
										5	PiPr3	170.146	-0.1795	0.0241	0.720835	0.663149	0.855335	3.65358	120.096	38.763
	mean	5.6	17.225	3.375	-0.20687	-0.01219	9.45	152.911		6	PnBu3	171.481	-0.18653	0.02738	0.776671	0.492819	0.932643	4.22201	127.053	33.5179
	stdev	3.14245	2.02778	1.10312	0.0412728	0.0424278	8.53273	23.9094		7	PtBu3	183.673	-0.17267	0.02754	1.28659	0.828634	0.936414	3.27754	127.426	43.839
										8	PnPent3	170.161	-0.1834	0.019	0.721462	0.568656	0.735131	3.9603	109.285	35.8542
	Standardized									9	PCyp3	165.216	-0.1811	0.0197	0.51464	0.624383	0.75163	3.72074	110.755	37.5763
		OA	TM	RE	HOMO	LUMO	He8	Ni_4P		10	PCy3	174.744	-0.1768	0.0259	0.913144	0.728568	0.89776	3.49602	123.925	40.7706
	PtBu3	-0.763735	1.26986	-0.158641	0.828634	0.936414	1.68176	1.28659		11	PPh3	165.787	-0.18694	-0.05061	0.538522	0.482885	-0.905538	4.18655	-38.2864	33.2197
	P(CF3)3	1.7184	-1.39315	-1.51842	-1.70936	-1.08844	-0.755913	-0.471456		12	PoTol3	183.423	-0.1817	-0.0487	1.27614	0.609845	-0.86052	3.98433	-34.1887	37.1043
	PMe3	-0.540979	0.530137	1.20114	0.397841	1.05756	-0.755913	-1.35366		13	PoClPh3	184.742	-0.1961	-0.0642	1.33131	0.260947	-1.22585	5.13186	-67.0421	26.3623
	PPh3	-0.41369	-0.40685	0.475923	0.482885	-0.905538	-0.169934	0.538522		14	PpTol3	165.696	-0.18042	-0.05171	0.534716	0.640858	-0.931464	3.67299	-40.6185	38.0828
										15	PpClPh3	165.976	-0.20113	-0.07005	0.546427	0.139075	-1.36373	5.30414	-79.4949	22.6359
										18	Pnaph3	184.153	-0.1787	-0.0733	1.30667	0.682532	-1.44033	3.75721	-86.3339	39.3409
OA Barrier with HOMO and Ni4_P										19	PBn3	165.897	-0.1962	-0.0382	0.543123	0.258524	-0.613041	4.9157	-11.9794	26.313
										20	PF3	114.907	-0.28188	-0.03544	-1.58951	-1.81742	-0.54799	11.0441	-6.26996	-37.5229
	Raw	OA	HOMO	Ni_4P		0.0118875	-78.6006	-12.4778		21	PCl3	118.979	-0.27201	-0.1087	-1.4192	-1.57828	-2.27469	10.3167	-161.556	-30.1668
	PtBu3	3.2	-0.17267	183.673		0.00319334	1.84991	0.733947		22	PBr3	123.565	-0.2676	-0.1505	-1.22739	-1.47143	-3.25989	10.0246	-250.151	-26.8838
	P(CF3)3	11	-0.27742	141.639		0.999503	0.140062	#N/A		23	PI3	129.107	-0.2493	-0.1657	-0.995601	-1.02804	-3.61815	8.65205	-282.356	-13.2422
	PMe3	3.9	-0.19045	120.546		1006.27	1	#N/A		24	PCF33	141.639	-0.27742	-0.05837	-0.471456	-1.70936	-1.08844	11.0113	-54.803	-34.2323
	PPh3	4.3	-0.18694	165.787		39.4804	0.0196172	#N/A		25	PCCl33	171.656	-0.2662	-0.1127	0.78399	-1.43751	-2.36896	10.4862	-169.889	-25.9041
										26	PC2F53	173.492	-0.2721	-0.0707	0.86078	-1.58046	-1.37905	10.9718	-80.852	-30.3071
	Standardized	OA	HOMO	Ni_4P		0.0904461	-1.03234	3.96927e-17		28	POMe3	156.764	-0.2074	-0.0003	0.161139	-0.0128414	0.280241	5.68746	68.336	17.9718
	PtBu3	-0.763735	0.828634	1.28659		0.0242966	0.0242966	0.0222854		29	POEt3	170.704	-0.21342	0.00379	0.744173	-0.1587	0.37664	6.32634	77.0446	13.4631
	P(CF3)3	1.7184	-1.70936	-0.471456		0.999503	0.0445708	#N/A		31	POiPr3	172.467	-0.1973	0.004	0.81791	0.231872	0.381589	5.08026	77.4946	25.4838
	PMe3	-0.540979	0.397841	-1.35366		1006.27	1	#N/A		32	POBu3	179.375	-0.2022	0.0042	1.10683	0.11315	0.386303	5.54752	77.9377	21.8199
	PPh3	-0.41369	0.482885	0.538522		3.99801	0.00198656	#N/A		33	POtBu3	175.977	-0.1901	0.0062	0.964714	0.406321	0.433442	4.55606	82.1679	30.8492
										34	POnPent3	166.076	-0.2057	0.0005	0.550609	0.028348	0.299096	5.66453	70.0576	19.2272
										35	POPh3	152.936	-0.2011	-0.0471	0.00103516	0.139802	-0.822809	5.14677	-30.8815	22.6758
TM Barrier with LUMO and Ni4_P										38	CataCxium-PCy	175.764	-0.1734	-0.0431	0.955805	0.810946	-0.728531	3.2409	-22.3391	43.3051
										41	CataCxium-PtB	183.382	-0.1761	-0.043	1.27442	0.745528	-0.726175	3.54368	-22.106	41.2811
	Raw	TM	LUMO	Ni_4P		0.0326668	44.3534	12.7705		42	CPhos	177.551	-0.1606	-0.0449	1.03055	1.12108	-0.770956	2.25605	-26.1498	52.8496
	PtBu3	19.8	0.02754	183.673		0.0137967	7.77487	2.13263		43	DavePhos	173.243	-0.1635	-0.0505	0.850365	1.05081	-0.902945	2.43279	-38.0326	50.6924
	P(CF3)3	14.4	-0.05837	141.639		0.973603	0.658906	#N/A		44	tBuDavePhos	188.529	-0.1709	-0.0498	1.48969	0.871519	-0.886447	3.19614	-36.5064	45.1526
	PMe3	18.3	0.03268	120.546		18.4419	1	#N/A		47	JohnPhos	184.117	-0.1725	-0.0519	1.30516	0.832753	-0.935943	3.26945	-40.9702	43.9652
	PPh3	16.4	-0.05061	165.787		16.0133	0.434157	#N/A		48	CyJohnPhos	176.42	-0.1784	-0.0523	0.983242	0.689801	-0.94537	3.6417	-41.8394	39.575
										49	MePhos	174.393	-0.18	-0.0476	0.898464	0.651035	-0.834594	3.74337	-31.882	38.3844
	Standardized	TM	LUMO	Ni_4P		0.385173	0.92802	-8.61754e-16		50	tBuMePhos	183.795	-0.172	-0.0496	1.2917	0.844867	-0.881733	3.22633	-36.0955	44.3386
	PtBu3	1.26986	0.936414	1.28659		0.162676	0.162676	0.16247		53	RuPhos	205.479	-0.1732	-0.0476	2.19862	0.815792	-0.834594	3.57842	-31.7959	43.4144
	P(CF3)3	-1.39315	-1.08844	-0.471456		0.973603	0.32494	#N/A		54	SPhos	204.361	-0.1695	-0.0382	2.15186	0.90544	-0.613041	3.2743	-11.8728	46.1756
	PMe3	0.530137	1.05756	-1.35366		18.4419	1	#N/A		55	XPhos	173.283	-0.1808	-0.0503	0.852038	0.631651	-0.898231	3.79305	-37.6085	37.7892
	PPh3	-0.40685	-0.905538	0.538522		3.89441	0.105586	#N/A		56	tBuXPhos	178.56	-0.1759	-0.0511	1.07275	0.750374	-0.917087	3.47064	-39.2898	41.4368
										57	cBridP	210.027	-0.1713	-0.0408	2.38884	0.861827	-0.674322	3.48314	-17.3686	44.8254
										67	PHMe2	118.982	-0.2036	0.0194	-1.41907	0.079229	0.744559	4.93964	109.991	20.8567
OA Barrier with HOMO and Ni4_P										72	PAd2H	171.33	-0.1872	0.0037	0.770355	0.476585	0.374518	4.27288	76.8555	33.0184
										74	PMe2Et	142.638	-0.1891	0.0286	-0.429674	0.43055	0.961398	4.08114	129.559	31.6398
	Raw	RE	HOMO	Ni_4P		-0.0290853	27.9056	13.5953		75	PMe2Pr	142.76	-0.1885	0.0265	-0.424571	0.445088	0.911902	4.03543	125.108	32.0871
	PtBu3	3.2	-0.17267	183.673		0.00966409	5.59843	2.22116		76	PMe2iPr	146.718	-0.1853	0.0297	-0.25903	0.522621	0.987324	3.83096	131.902	34.4685
	P(CF3)3	1.7	-0.27742	141.639		0.963088	0.423872	#N/A		77	PMe2tBu	145.916	-0.18486	0.0315	-0.292573	0.533281	1.02975	3.78685	135.716	34.7978
	PMe3	4.7	-0.19045	120.546		13.0459	1	#N/A		80	PPhMe2	147.76	-0.1884	-0.03937	-0.215448	0.447511	-0.640617	4.08701	-14.5098	32.155
	PPh3	3.9	-0.18694	165.787		4.68783	0.179667	#N/A		81	PMe2Bn	159.525	-0.1923	-0.0329	0.276617	0.353017	-0.488123	4.53341	-0.762037	29.2304
										82	PMeEt2	141.533	-0.1881	0.0265	-0.47589	0.454779	0.911902	3.98941	125.105	32.3871
	Standardized	RE	HOMO	Ni_4P		-0.630404	1.04408	-2.05128e-17		84	PMeiPr2	166.382	-0.1802	0.0226	0.563407	0.646189	0.819981	3.66386	116.906	38.246
	PtBu3	-0.158641	0.828634	1.28659		0.209463	0.209463	0.192124		85	PMetBu2	169.942	-0.1788	0.02253	0.712303	0.68011	0.818331	3.59613	116.768	39.2854
	P(CF3)3	-1.51842	-1.70936	-0.471456		0.963088	0.384248	#N/A		87	PPh2Me	147.385	-0.189	-0.04768	-0.231133	0.432973	-0.83648	4.12971	-32.1264	31.708
	PMe3	1.20114	0.397841	-1.35366		13.0459	1	#N/A		91	PPhEt2	155.727	-0.19267	-0.04659	0.117767	0.344053	-0.810789	4.51734	-29.7927	28.9595
	PPh3	0.475923	0.482885	0.538522		3.85235	0.147646	#N/A		94	PPh2Et	152.847	-0.18807	-0.0478	-0.00268722	0.455506	-0.839308	4.12155	-32.3656	32.3943
										99	PPhiPr2	169.143	-0.186	-0.0444	0.678885	0.50566	-0.759172	4.15256	-25.1131	33.9163
										100	PPh2iPr	170.771	-0.1905	-0.0508	0.746975	0.39663	-0.910016	4.52562	-38.6754	30.5578
										103	PAd2Bu (CataCxium-A)	176.312	-0.1731	0.019	0.978725	0.818215	0.735131	3.22383	109.302	43.5282
										104	PCytBu2	177.431	-0.1727	0.026	1.02553	0.827907	0.900117	3.2057	124.144	43.825
										105	PPhtBu2	182.73	-0.1764	-0.0389	1.24715	0.738259	-0.62954	3.55951	-13.4166	41.0582
										106	PtBu2Bn	188.916	-0.18216	-0.03031	1.50588	0.5987	-0.427078	4.08578	4.80969	36.7539
										107	PCy2tBu	178.358	-0.173	0.0245	1.0643	0.820638	0.864763	3.2403	120.967	43.6
										108	PAd2tBu	184.575	-0.169	0.0206	1.32432	0.917554	0.772842	2.9998	112.717	46.5751
										118	PPh2Bn	169.579	-0.1891	-0.0491	0.69712	0.43055	-0.869948	4.4014	-35.075	31.6036
